# Supplementary material for: Organic–inorganic hybrid bent-core liquid crystals with cubic silsesquioxane cores
Source: Royal Society of Chemistry journal article supplement (doi:10.1039/b804193h), 2008-01-01
Supplement: b804193h.pdf [file b804193h.pdf]

Supporting Information

# Organic-Inorganic Hybrid Bent-Core Liquid Crystals with Cubic Silsesquioxane Cores

*Qiwei Pan, Xiaofang Chen, Xinghe Fan\*, Zhihao Shen\*, Qifeng Zhou\**

Beijing National Laboratory for Molecular Sciences,

Key Laboratory of Polymer Chemistry and Physics of Ministry of Education,

College of Chemistry and Molecular Engineering,

Peking University, Beijing 100871, China

\*To whom correspondence should be addressed. E-mail: Xinghe Fan (fanxh@pku.edu.cn), Zhihao Shen (zshen@pku.edu.cn) and Qifeng Zhou (qfzhou@pku.edu.cn)

**GPC Traces of POSS-8BC and POSS-8SiBC.** The structures and purities of POSS-8BC and POSS-8SiBC are further characterized by gel permeation chromatography as shown in Fig. S1. GPC traces of the samples are symmetrically narrow, and they have larger elution volumes than  $Q_8M_8^H$ .

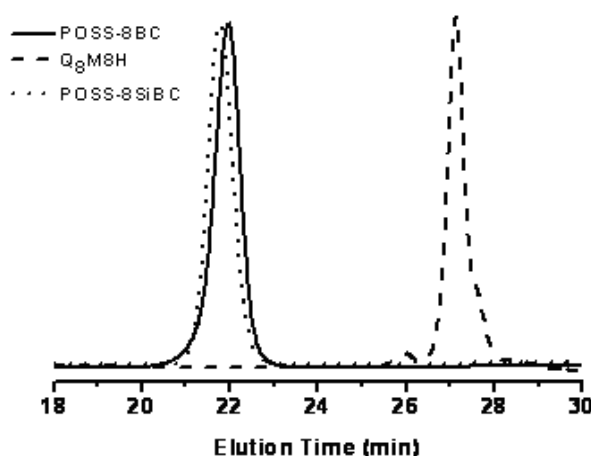

Fig. S1 GPC traces of POSS-8BC, POSS-8SiBC, and  $Q_8M_8^H$ .

**$^1\text{H}$  NMR Spectra.** Chemical structures of POSS-8BC, POSS-5BC, and POSS-8SiBC are confirmed with  $^1\text{H}$  NMR as shown in Fig. S2, S3, and S4.  $^1\text{H}$  NMR spectrum of POSS-3.5BC is similar to that of POSS-5BC, except that integral of peak h is larger.

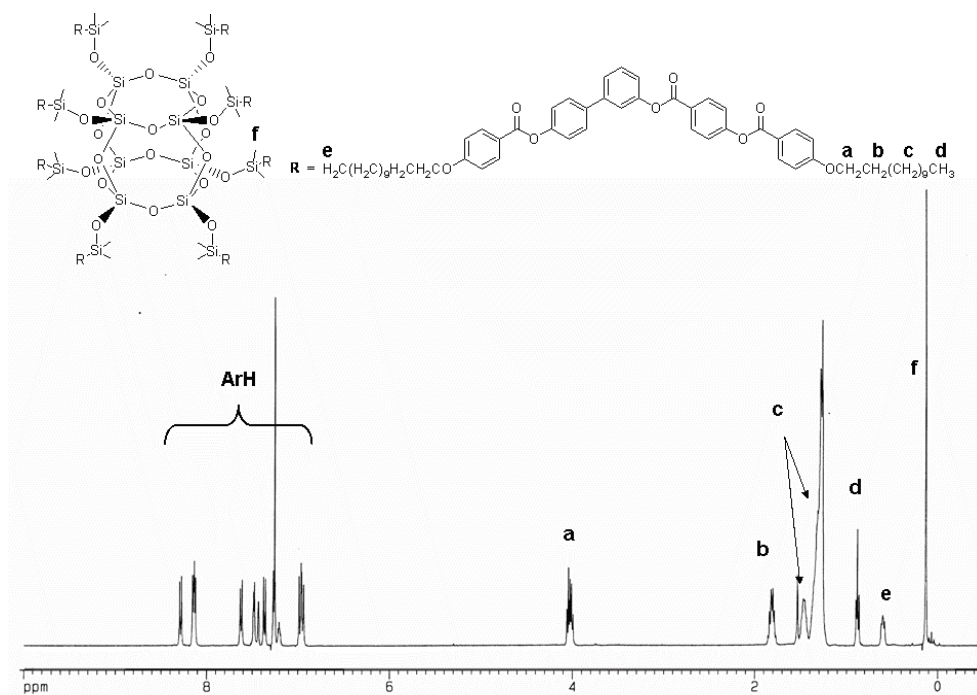

Fig. S2  $^1\text{H}$  NMR spectrum of POSS-8BC.

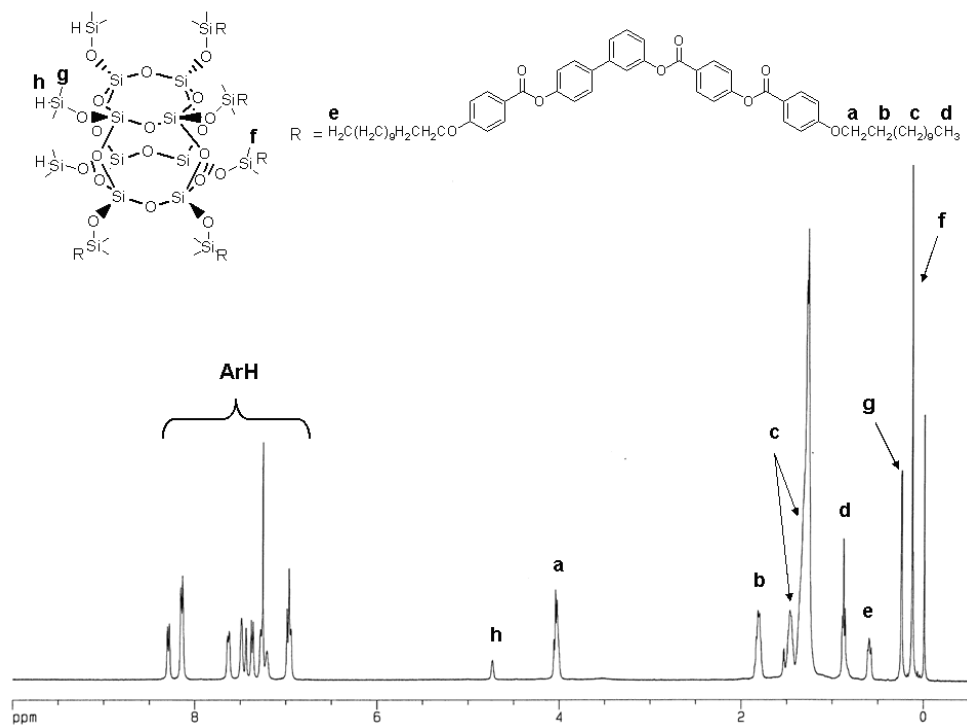

Fig. S3  $^1\text{H}$  NMR spectrum of POSS-5BC.

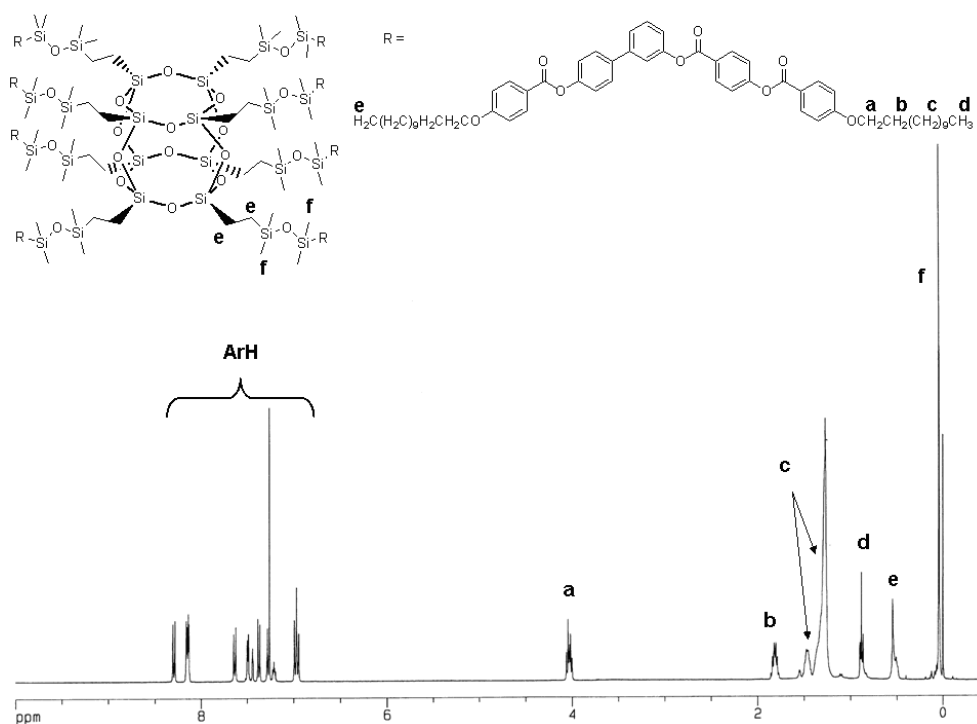

Fig. S4  $^1\text{H}$  NMR spectrum of POSS-8SiBC.

**2D WAXD patterns of POSS-5BC and POSS-3.5BC.** Liquid Crystalline phase structures of POSS-5BC and POSS-3.5BC were studied by 2D WAXD as shown in Fig. S5a and S5b, respectively. For both patterns, three pairs of diffraction arcs with scattering vector ratio of 1:2:3 appear on the meridian, and two pairs of scattering halos are located in the quadrants in the high-angle region. They are patterns of SmC phases.

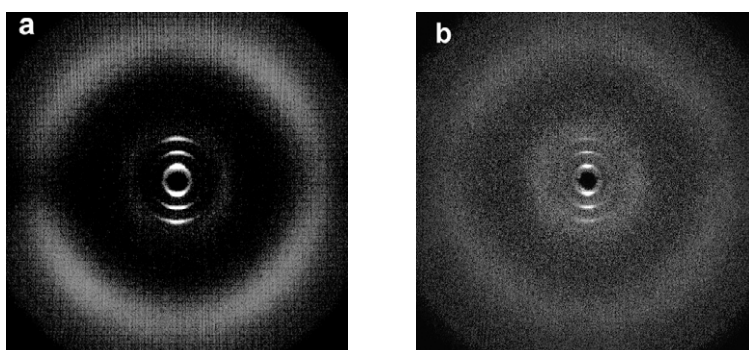

Fig. S5 2D WAXD patterns of POSS-5BC (a) and POSS-3.5BC (b) when X-ray beam is perpendicular to the shear direction.
